# Supplementary material
Source: ML conference proceedings conference paper supplement (https://openreview.net/forum?id=tX_dIvk4j-s)
Supplement: supplementary_material [file attachment]

---

# Supplementary Material

## VisCo Grids: Surface Reconstruction with Viscosity and Coarea Grids

---

### 1 A Computing $\nabla f(w_I)$

2 We will use the notation set in Section 3. For the losses in Eq. 3 in the main paper (the normal  
3 term) and Eq. 11 we require computing  $\nabla f(w_I)$ , where  $w_I$  is the center of the voxel of interest. For  
4 simplicity we will consider the voxel  $[0, h]^3$ . The 8 trilinear basis functions for this voxel are

$$\varphi_{abc}(x, y, z) = \frac{1}{h^3} \begin{cases} x & \text{if } a = 0 \\ h - x & \text{if } a = 1 \end{cases} \cdot \begin{cases} y & \text{if } b = 0 \\ h - y & \text{if } b = 1 \end{cases} \cdot \begin{cases} z & \text{if } c = 0 \\ h - z & \text{if } c = 1 \end{cases} \quad (1)$$

5 where the corners of the voxel are indexed by  $a, b, c \in \{0, 1\}$ . Given function values at these corner  
6 nodes,  $f_{abc}$ , the trilinear interpolant of  $f$  inside the voxel is

$$f_{abc}(x, y, z) = \sum_{a, b, c \in \{0, 1\}} f_{abc} \varphi_{abc}(x, y, z). \quad (2)$$

7 Taking the gradient of this interpolant we get

$$\nabla f_{abc}(x, y, z) = \sum_{a, b, c \in \{0, 1\}} f_{abc} \nabla \varphi_{abc}(x, y, z) \quad (3)$$

8 and for the center voxel point,  $(x, y, z) = \frac{1}{2}(h, h, h)$ , we have

$$\nabla \varphi_{abc} \left( \frac{h}{2}, \frac{h}{2}, \frac{h}{2} \right) = \frac{1}{4h} [(-1)^a, (-1)^b, (-1)^c]. \quad (4)$$

9 Similarly we can compute the gradient at an arbitrary point  $(x, y, z)$  inside a voxel.

### 10 B Implementation Details

11 For all experiments we follow a coarse-to-fine approach. We start optimizing at a  $64 \times 64 \times 64$  grid  
12 resolution, then scale up to  $128 \times 128 \times 128$  and finish at  $256 \times 256 \times 256$ . At each scale up we  
13 initialize the higher resolution grid values,  $f_I$ , by using trilinear interpolation within the voxels of the  
14 coarser grid. After each up-sampling, we prune grid voxels by removing those with an SDF value  
15 higher/lower than threshold  $\pm t$ , where  $t \in \{0.4, 0.9\}$  enabling faster training and lower memory  
16 consumption; this is especially useful at the highest resolution grid. For 30 and 21 minutes running  
17 time budgets we prune with  $t = 0.9$ , and for 15 and 8 minutes with  $t = 0.4$ . For 30 minutes budget  
18 we perform 5 epochs at 64 resolution, 5 epochs at 128 and 3 at 256. For the rest of running time  
19 budgets we perform 2 epochs at each resolution, except for the 8 minutes budget, where at 256  
20 resolution we perform only 1 epoch. Each epoch consists of 12800 iterations. At each training  
21 iteration the batch is composed by sampling random 10% of the *active* voxels (those which are left  
22 after pruning).

23 For all the final experiments we set  $\lambda_p = 0.1$ ,  $\lambda_n = 10^{-5}$ ,  $\lambda_v = 1e - 4$ ,  $\lambda_c = 1e - 6$ ,  $\epsilon = 1e - 2$ . As  
24 for the optimizer, we use Adam [1] with a constant learning rate of 0.001,  $\beta_1 = 0.9$  and  $\beta_2 = 0.999$ .  
25 All models are trained with a single NVIDIA Quadro GP-100 GPU.

|        |                     | Anchor      | Daratech    | DC          | Gargoyle    | Lord Quas   | Mean        |
|--------|---------------------|-------------|-------------|-------------|-------------|-------------|-------------|
| 30 min | $d_C$               | <b>0.21</b> | <b>0.26</b> | <b>0.15</b> | <b>0.17</b> | <b>0.12</b> | <b>0.19</b> |
|        | $d_H$               | 3.00        | 4.06        | 2.22        | 4.40        | 1.06        | 2.95        |
|        | $d_C^{\rightarrow}$ | 0.15        | 0.14        | 0.09        | 0.11        | 0.07        | 0.11        |
|        | $d_H^{\rightarrow}$ | 1.07        | 1.76        | 2.76        | 0.95        | 0.64        | 1.44        |
| 21 min | $d_C$               | <u>0.27</u> | <u>0.27</u> | <u>0.16</u> | <b>0.17</b> | <b>0.12</b> | <u>0.20</u> |
|        | $d_H$               | 5.60        | 4.06        | 2.13        | 4.33        | 0.99        | 3.42        |
|        | $d_C^{\rightarrow}$ | 0.14        | 0.14        | 0.09        | 0.11        | 0.07        | 0.12        |
|        | $d_H^{\rightarrow}$ | 1.17        | 1.77        | 2.77        | 0.93        | 0.64        | 1.45        |
| 15 min | $d_C$               | <u>0.27</u> | <b>0.26</b> | <b>0.15</b> | <b>0.17</b> | <b>0.12</b> | <u>0.20</u> |
|        | $d_H$               | 5.68        | 4.20        | 2.23        | 4.45        | 1.10        | 3.53        |
|        | $d_C^{\rightarrow}$ | 0.14        | 0.14        | 0.09        | 0.11        | 0.07        | 0.11        |
|        | $d_H^{\rightarrow}$ | 1.10        | 1.77        | 2.80        | 1.04        | 0.66        | 1.47        |
| 8 min  | $d_C$               | 0.28        | <b>0.26</b> | <b>0.15</b> | <b>0.17</b> | <u>0.13</u> | <u>0.20</u> |
|        | $d_H$               | 5.69        | 4.15        | 2.23        | 4.45        | 1.14        | 3.53        |
|        | $d_C^{\rightarrow}$ | 0.15        | 0.13        | 0.09        | 0.11        | 0.07        | 0.11        |
|        | $d_H^{\rightarrow}$ | 1.15        | 1.78        | 2.78        | 0.98        | 0.68        | 1.48        |

Table I: Quantitative results of VisCo for different training time budgets on the surface reconstruction benchmark [2]. Reducing the running time from 30 mins to 8 mins only marginally reduces reconstruction metrics.

We did a grid search for all the hyper-parameters in the range of  $10^{-6}$  to  $10^{-1}$  with multiplicative steps of  $10^{-1}$ . We observed minimal performance difference. For all benchmark datasets we use the exact same hyper-parameters. More specifically, for the two proposed new losses – Viscosity and Coarea – we observe no performance change in the ranges  $[5e-3, 5e-2]$  and  $[5e-7, 5e-6]$ , respectively, which allows for consistency across scenes with fixed hyper-parameters (see Fig. 7 and 8).

We will publish the source code which reproduces the experimental results upon the paper acceptance.

## C Training time

In this section, we present qualitative and quantitative results of VisCo for different running time budgets. We experiment with the running time versus reconstruction quality trade-offs and show that short time training produces comparable reconstruction quality to longer time training. In Tab. 1 we show quantitative results and in Fig. 1 qualitative results. Note that reducing the running time from 30 mins to 8 mins only marginally reduces reconstruction metrics, while qualitatively produces indistinguishable reconstruction results. The different running times versions were created mostly by reducing the number of epochs per resolution from 5 down to 2 (see more details in Sec. B). We strongly believe that further significant speedups are possible with a more efficient implementation.

Below we report average time and memory footprint required for a single training iteration on NVIDIA Quadro GP100 GPU. Because of the pruning applied to the grid, we need to learn only a sparse set of the grid values (we call them *active*).

- $64^3$  resolution (57% of the grid values are active): 2.3 msec, 975MB VRAM
- $128^3$  resolution (31% of the grid values are active): 8.6 msec, 1070MB VRAM
- $256^3$  resolution (30% of the grid values are active): 25.8 msec, 1650MB VRAM

For neural networks (INRs) every point evaluation requires forward and backward in a network involving all network’s parameters in general, while for a grid we only require nearby grid function values (learnable parameters). Typical iteration times for NN (taken from DiGS) are:

- 66.5K params: 5.2-12.0 msec
- 2.1M params: 17.5 msec

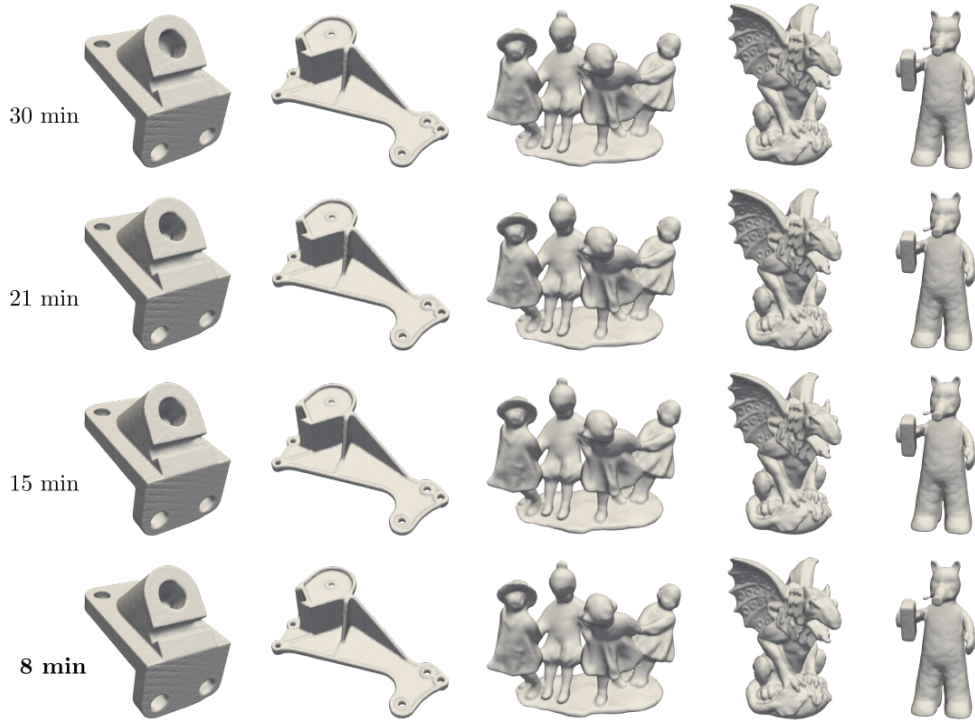

Figure I: Qualitative results of VisCo for different training time budgets on the surface reconstruction benchmark [2]. Note that reduction of the training time does not result in inferior reconstruction. The models trained for 30 mins and 8 mins produce indistinguishable reconstruction results.

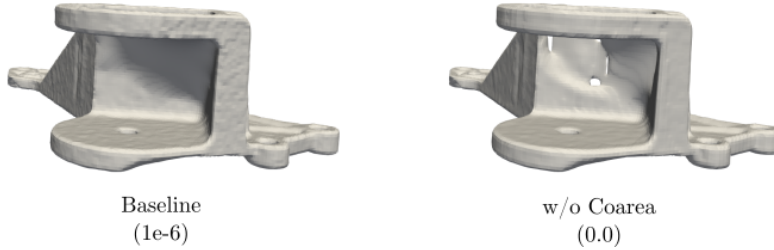

Figure II: Visual comparison for Daratech between all losses vs. w/o Coarea. Reconstructed meshes from Tab. 3. Note small holes when removing the Coarea loss.

## 53 D Daratech Coarea Effect

54 In this section we further study why in Tab. 3, Daratesh seem to have better reconstruction w/o  
 55 Coarea loss. Visual inspection reveals higher qualitative result for the mesh reconstructed with the  
 56 Coarea loss although it has a higher quantiative error. We observe small holes when removing the  
 57 Coarea loss, see Fig. II.

## 58 References

- 59 [1] D. P. Kingma and J. Ba. Adam: A method for stochastic optimization. *arXiv preprint*  
 60 *arXiv:1412.6980*, 2014.

- 61 [2] F. Williams, T. Schneider, C. Silva, D. Zorin, J. Bruna, and D. Panozzo. Deep geometric prior for  
62 surface reconstruction. In *Proceedings of the IEEE/CVF Conference on Computer Vision and*  
63 *Pattern Recognition*, pages 10130–10139, 2019.
